# Supplementary material for: A Metabolomics-Based Study on the Discriminative Classification Models and Toxicological Mechanism of Estazolam Fatal Intoxication
Source: Metabolites. 2023 Apr 17;13(4):567. doi: 10.3390/metabo13040567 (PMC10144813; doi:10.3390/metabo13040567)
Supplement: Supplementary file 1 [file metabolites-13-00567-s001.zip › metabolites-2287723-supplementary.xlsx]

## Sheet: 392 metabolites in plasma 
Name	Formula	Molecular Weight	RT [min]
(-)-nabilone	C24 H36 O3	372.266	8.633
(-)-pinellic acid	C18 H34 O5	330.241	9.575
(+)-absinthin	C30 H40 O6	496.283	9.602
(+/-)9-HpODE	C18 H32 O4	312.23	10.146
(+/-)-Camphoric acid	C10 H16 O4	200.105	6.498
(+/-)-Coniine	C8 H17 N	127.136	4.574
(+/-)-Metanephrine	C10 H15 N O3	197.105	5.143
(10S)-Juvenile hormone III diol	C16 H28 O4	284.199	9.575
(E)-p-coumaric acid	C9 H8 O3	164.047	1.408
(R)-3-hydroxybutyrylcarnitine	C11 H21 N O5	247.142	2.084
1,3,4-Trihydroxy-5-oxocyclohexanecarboxylic acid	C7 H10 O6	190.048	2.227
1-[(9Z)-hexadecenoyl]-sn-glycero-3-phosphocholine	C24 H48 N O7 P	493.317	9.746
10,16-Dihydroxyhexadecanoic acid	C16 H32 O4	288.23	8.404
10-GINGEROL	C21 H34 O4	350.246	9.203
10-Hydroxydecanoic acid	C10 H20 O3	188.141	9.122
10-Undecenoic acid	C11 H20 O2	184.146	9.628
11-Aminoundecanoic acid	C11 H23 N O2	201.173	1.874
11-Hexadecenoic acid	C16 H30 O2	254.225	9.285
12-Hydroxylauric acid	C12 H24 O3	216.172	9.666
15,16-DiHODE	C18 H32 O4	312.23	8.55
16-Hydroxyhexadecanoic acid	C16 H32 O3	272.235	10.154
17,21-Dihydroxypregnenolone	C21 H32 O4	348.229	7.847
1-Cyclohexenecarboxylic Acid	C7 H10 O2	126.068	6.441
1-Methylhistamine	C6 H11 N3	125.095	0.979
1-Methylinosine	C11 H14 N4 O5	282.096	4.402
1-O-(indol-3-ylacetyl)-beta-D-glucose	C16 H19 N O7	337.117	6.592
1-Salicylate glucuronide	C13 H14 O9	314.064	4.926
2-(3-Phenylpropyl)pyridine	C14 H15 N	197.12	6.624
2,3,4,5-tetrachloro-4'-biphenylol	C12 H6 Cl4 O	305.916	0.94
2,3,4,5-Tetrahydroxypentanal	C5 H10 O5	150.053	1.653
2,4,6-Octatriyn-1-ol	C8 H6 O	118.042	2.19
2,5-Dimethyl-4-ethoxy-3(2H)-furanone	C8 H12 O3	156.079	6.368
2-amino-3-oxoadipic acid	C6 H9 N O5	175.048	1.78
2-Aminoacetophenone	C8 H9 N O	135.068	2.188
2-arachidonoylglycerol	C23 H38 O4	378.277	9.519
2-Butoxyacetic acid	C6 H12 O3	132.079	6.03
2'-Deoxycytidine	C9 H13 N3 O4	227.09	1.663
2-Furoic acid	C5 H4 O3	130.027	1.788
2-Hexenoylcarnitine	C13 H23 N O4	257.163	7.532
2-Hydroxycaproic acid	C6 H12 O3	132.079	6.361
2-Hydroxymyristic acid	C14 H28 O3	244.204	9.445
2-hydroxysebacic acid	C10 H18 O5	218.115	6.76
2-Hydroxyvaleric acid	C5 H10 O3	118.063	5.102
2-Isopropylmalic acid	C7 H12 O5	176.068	4.444
2-Methylthiazolidine	C4 H9 N S	103.045	1.672
2-Oxoglutaric acid	C5 H6 O5	146.021	1.77
2-palmitoyl-sn-glycero-3-phosphocholine	C24 H50 N O7 P	495.332	10.263
2-Vinyl-4H-1,3-dithiine	C6 H8 S2	144.007	1.255
3, 5-Tetradecadiencarnitine	C21 H37 N O4	367.272	8.701
3,4-Dihydroxyphenylglycol	C8 H10 O4	170.058	6.444
3,4-Dihydroxyphenylglycol O-sulfate	C8 H10 O7 S	250.015	2.326
3,4-Dimethyl-5-pentyl-2-furanpropanoic acid	C14 H22 O3	238.157	8.374
3-Hydroxybutyric acid	C4 H8 O3	104.047	2.335
3-Hydroxy-cis-5-tetradecenoylcarnitine	C21 H39 N O5	385.282	8.507
3-hydroxyhexadecanoylcarnitine	C23 H45 N O5	415.329	9.293
3-Hydroxysuberic acid	C8 H14 O5	190.084	5.572
3-Hydroxytetradecanedioic acid	C14 H26 O5	274.178	8.248
3-indole carboxylic acid glucuronide	C15 H15 N O8	337.08	6.373
3-Mercaptohexyl butyrate	C10 H20 O2 S	204.119	1.645
3-Methyladipic acid	C7 H12 O4	160.073	5.992
3-Methylglutaconic acid	C6 H8 O4	144.042	4.918
3-Methylglutarylcarnitine	C13 H23 N O6	289.152	5.313
3-Oxotetradecanoic acid	C14 H26 O3	242.188	10.119
3-Phenyllactic acid	C9 H10 O3	166.063	6.78
4-Aminobenzoic acid	C7 H7 N O2	137.048	1.183
4-Coumaric acid	C9 H8 O3	164.047	6.661
4-Hydroxy-1H-indole-3-acetonitrile	C10 H8 N2 O	172.064	5.72
4-hydroxy-4-(indol-3-ylmethyl)glutamic acid	C14 H16 N2 O5	292.106	5.436
4-Hydroxy-5-[4-hydroxy-3-(sulfooxy)phenyl]pentanoic acid	C11 H14 O8 S	306.041	5.973
4-Hydroxybenzaldehyde	C7 H6 O2	122.037	6.414
4-Methyleneglutamic acid	C6 H9 N O4	159.053	1.733
4-Oxoproline	C5 H7 N O3	129.043	1.883
4-Pyridoxic acid	C8 H9 N O4	183.053	3.268
5-Hydroxyindole-3-acetic acid	C10 H9 N O3	191.058	6.428
5-Hydroxytryptophan	C11 H12 N2 O3	220.085	4.509
5-Hydroxytryptophol	C10 H11 N O2	177.079	6.816
5-Methylcytosine	C5 H7 N3 O	125.059	2.057
5-sulfooxymethylfurfural	C6 H6 O6 S	205.988	5.548
6-Acetamido-2-oxohexanoic acid	C8 H13 N O4	187.084	4.641
6-Acetylmorphine	C19 H21 N O4	327.147	5.76
6-Methoxy-3-(2-thiazolyl)-1H-indole	C12 H10 N2 O S	230.051	8.116
6-Oxohexanoic acid	C6 H10 O3	130.063	6.287
7-Aminonitrazepam	C15 H13 N3 O	251.106	5.245
7-Ethyl-2,3,4,5,6,7-hexahydrocyclopent[b]azepin-8(1H)-one	C11 H17 N O	179.131	8.705
7-Mercaptoheptanoylthreonine	C11 H21 N O4 S	263.119	6.816
7-Methylguanine	C6 H7 N5 O	165.065	1.767
8-Hydroxyhexadecanedioic acid	C16 H30 O5	302.209	8.939
8-METHOXYKYNURENIC ACID	C11 H9 N O4	219.053	5.987
9-Oxononanoic acid	C9 H16 O3	172.11	6.749
Acadesine	C9 H14 N4 O5	258.096	1.923
Aceglutamide	C7 H12 N2 O4	188.079	1.653
Aceturic acid	C4 H7 N O3	117.043	1.649
ACETYL ARGININE	C8 H16 N4 O3	216.123	1.659
ACETYL PROLINE	C7 H11 N O3	157.074	4.603
Acetylcarnitine	C9 H17 N O4	203.116	6.629
Acetyl-L-carnitine	C9 H17 N O4	203.116	1.659
Acetyllycopsamine	C17 H27 N O6	341.184	6.361
Acetylshikonin	C18 H18 O6	330.11	7.167
acetyltaurine	C4 H9 N O4 S	167.025	1.215
Adenine	C5 H5 N5	135.055	4.451
adrenaline	C9 H13 N O3	183.089	6.613
Alanylclavam	C8 H12 N2 O4	200.08	1.993
Albendazole sulfoxide	C12 H15 N3 O3 S	281.083	6.495
Allantoin	C4 H6 N4 O3	158.044	1.494
Aminohippuric acid	C9 H10 N2 O3	194.069	5.117
Amphetamine	C9 H13 N	135.105	5.59
APM	C7 H13 N O4	175.084	2.364
apronalide	C9 H16 N2 O2	184.121	5.021
Arabinosylhypoxanthine	C10 H12 N4 O5	268.081	3.181
Asarone	C12 H16 O3	208.109	8.064
Ascorbic acid	C6 H8 O6	176.032	1.226
asp-leu	C10 H18 N2 O5	246.121	4.12
asulam	C8 H10 N2 O4 S	230.036	4.726
Aucubin	C15 H22 O9	346.126	5.95
Azelaic acid	C9 H16 O4	188.105	5.911
Benzylformamide	C8 H9 N O	135.068	6.079
Bergenin	C14 H16 O9	328.08	5.865
beta-D-Ethyl glucuronide	C8 H14 O7	222.074	4.84
Betaine	C5 H11 N O2	117.079	1.215
Biacetyl	C4 H6 O2	86.0366	1.965
Brassylic acid	C13 H24 O4	244.167	8.907
Bucillamine	C7 H13 N O3 S2	223.034	6.243
Butenylcarnitine	C11 H19 N O4	229.131	6.152
butyl acrylate	C7 H12 O2	128.084	6.443
Butylparaben	C11 H14 O3	194.094	9.85
Butyryl-L-homoserine lactone	C8 H13 N O3	171.089	4.442
Caffeic acid 3-glucoside	C15 H18 O9	342.095	5.849
canthin-6-one	C14 H8 N2 O	220.063	0.958
Caprolactam	C6 H11 N O	113.084	1.224
Capryloylglycine	C10 H19 N O3	201.136	8.164
Cervonoyl ethanolamide	C24 H36 O3	372.266	9.009
Chenodeoxycholic Acid	C24 H40 O4	392.293	9.131
Chloral hydrate	C2 H3 Cl3 O2	163.92	1.236
chlormidazole	C15 H13 Cl N2	256.076	7.297
Cholic acid	C24 H40 O5	408.288	8.633
cis-3-Hexenyl phenylacetate	C14 H18 O2	218.13	8.754
cis-3-Hexenyl Pyruvate	C9 H14 O3	170.094	6.62
cis-4-Decenedioic acid	C10 H16 O4	200.105	7.437
cis-5-Tetradecenoylcarnitine	C21 H39 N O4	369.287	8.933
Citraconic acid	C5 H6 O4	130.027	2.33
Citric acid	C6 H8 O7	192.027	1.793
Codeine	C18 H21 N O3	299.152	5.419
Corticosterone	C21 H30 O4	346.214	8.461
Coumarin	C9 H6 O2	146.037	2.186
Creatine	C4 H9 N3 O2	131.069	1.489
Cucurbitacin F	C30 H46 O7	518.324	9.437
Cxa-10	C18 H33 N O4	327.24	8.188
cystine	C6 H12 N2 O4 S2	240.023	1.211
Cytidine	C9 H13 N3 O5	243.085	1.214
Cytosine	C4 H5 N3 O	111.043	1.652
D-(-)-Arabinose	C5 H10 O5	150.053	1.209
D-(+)-Mannose	C6 H12 O6	180.063	1.151
D-(+)-Proline	C5 H9 N O2	115.063	1.513
Daidzein	C15 H10 O4	254.058	7.562
dapdiamide A	C12 H20 N4 O5	300.143	1.751
decanoylcarnitine	C17 H33 N O4	315.24	8.211
D-Erythro-sphingosine 1-phosphate	C18 H38 N O5 P	379.249	9.456
D-Gluconic acid	C6 H12 O7	196.058	1.462
D-Glucono-delta-lactone	C6 H10 O6	178.048	1.218
Diazepam	C16 H13 Cl N2 O	284.071	9.226
Dibutyl malate	C12 H22 O5	246.147	6.018
Dibutyl phthalate	C16 H22 O4	278.152	10.114
Diethanolamine	C4 H11 N O2	105.079	1.162
Dihydrouridine	C9 H14 N2 O6	246.085	1.651
dihydroxyphenylalanine	C9 H11 N O4	197.069	5.538
Dimethyl disulfide	C2 H6 S2	93.991	6.26
Dinitro-ortho-cresol	C7 H6 N2 O5	198.028	9.068
Diphenol glucuronide	C12 H14 O8	286.069	4.237
DL-Arginine	C6 H14 N4 O2	174.112	1.338
DL-Citrulline	C6 H13 N3 O3	175.096	1.139
DL-Glutamic acid	C5 H9 N O4	147.053	1.149
DL-Histidine	C6 H9 N3 O2	155.069	1.095
DL-Lysine	C6 H14 N2 O2	129.079	0.997
DL-Mevalonic acid	C6 H12 O4	148.074	2.337
DL-Tryptophan	C11 H12 N2 O2	204.09	5.266
Dodecanedioic acid	C12 H22 O4	230.152	8.501
dopaquinone	C9 H9 N O4	195.053	4.979
Ecgonine	C9 H15 N O3	185.105	6.176
EDDA	C6 H12 N2 O4	176.08	1.668
ENU	C3 H7 N3 O2	117.054	1.127
Estazolam	C16 H11 Cl N4	294.067	8.365
Ethyl lactate	C5 H10 O3	118.063	4.716
Ethylmalonic acid	C5 H8 O4	132.042	4.694
Forskolin	C22 H34 O7	410.231	6.971
Fumaric acid	C4 H4 O4	116.011	2.109
Furfural	C5 H4 O2	96.0211	1.565
Gabapentin	C9 H17 N O2	171.126	6.696
gaboxadol	C6 H8 N2 O2	140.058	1.576
Galactosylsphingosine	C24 H47 N O7	461.336	9.133
gamma-Aminobutyric acid	C4 H9 N O2	103.063	1.177
g-Butyrobetaine	C7 H15 N O2	145.11	4.701
gemeprost	C23 H38 O5	394.272	8.113
Gemfibrozil	C15 H22 O3	250.157	9.036
Genistein	C15 H10 O5	270.053	8.174
Geranylacetone	C13 H22 O	194.167	6.847
g-Guanidinobutyrate	C5 H11 N3 O2	145.085	1.647
Ginkgoic acid	C22 H34 O3	346.251	10.558
glaucarubolone	C20 H26 O8	394.163	7.503
Gluconic acid	C6 H12 O7	196.058	1.149
Glu-Met	C10 H18 N2 O5 S	278.093	4.184
Glutaric acid	C5 H8 O4	132.043	1.214
Glutarylcarnitine	C12 H21 N O6	275.144	2.935
Glycylglycine	C4 H8 N2 O3	132.053	1.646
Glycylglycylglycine	C6 H11 N3 O4	189.075	1.886
Gly-Lys	C8 H17 N3 O3	203.127	1.976
Gramine	C11 H14 N2	174.115	8.788
Helenalin	C15 H18 O4	262.12	9.444
Heptylparaben	C14 H20 O3	236.141	8.735
Hexadecanedioic acid	C16 H30 O4	286.214	9.967
Hexanoic acid	C6 H12 O2	116.084	5.929
Hexanoylcarnitine	C13 H25 N O4	259.178	6.583
Hexanoylglycine	C8 H15 N O3	173.105	6.814
Hexyl 2-furoate	C11 H16 O3	196.11	8.884
Hexylresorcinol	C12 H18 O2	194.13	9.703
Hippuric acid	C9 H9 N O3	179.062	5.793
Histamine	C5 H9 N3	111.079	0.974
HMBA	C10 H20 N2 O2	200.152	8.325
Homocitrulline	C7 H15 N3 O3	189.111	1.729
Hostmaniane	C13 H18 O5	254.116	8.069
Hydroxyacetylaminofluorene	C15 H13 N O2	239.094	4.448
Hydroxyhexanoycarnitine	C13 H25 N O5	275.173	4.543
Hydroxyphenobarbital	C12 H12 N2 O4	248.08	5.89
Hydroxypropionylcarnitine	C10 H19 N O5	233.126	4.879
Hypotaurine	C2 H7 N O2 S	109.02	1.161
Hypoxanthin	C5 H4 N4 O	136.038	4.657
Hypoxanthine	C5 H4 N4 O	136.038	1.767
Imidapril	C20 H27 N3 O6	405.19	5.261
Indane	C9 H10	118.078	5.783
Indole	C8 H7 N	117.058	5.269
Indole-3-acrylic acid	C11 H9 N O2	187.063	5.277
Indole-3-lactic acid	C11 H11 N O3	205.074	6.928
Isatin	C8 H5 N O2	147.032	6.565
Isoleucine	C6 H13 N O2	131.095	2.373
Isoprenaline	C11 H17 N O3	211.121	7.947
Isovalerylglutamic acid	C10 H17 N O5	231.111	4.857
Isovitexin	C21 H20 O10	432.106	6.67
Juvenile hormone III	C16 H26 O3	266.188	9.637
kresoxim-methyl	C18 H19 N O4	313.131	5.699
L-(-)-Methionine	C5 H11 N O2 S	149.051	1.328
L-(-)-Serine	C3 H7 N O3	105.042	1.443
L-(-)-Threonine	C4 H9 N O3	119.058	1.142
L-(+)-Lactic acid	C3 H6 O3	90.0316	1.7
L-(+)-Leucine	C6 H13 N O2	131.095	6.513
Lactamide	C3 H7 N O2	89.0475	1.154
L-alpha-Aspartyl-L-phenylalanine	C13 H16 N2 O5	280.106	5.483
L-alpha-Glycerylphosphorylcholine	C8 H20 N O6 P	257.103	1.454
L-Ascorbic acid 2-sulfate	C6 H8 O9 S	255.989	1.222
L-dihydroanticapsin	C9 H15 N O4	201.1	5.754
Leu-Glu	C11 H20 N2 O5	260.137	5.27
Levulinic acid	C5 H8 O3	116.047	4.209
L-Fucono-1,5-lactone	C6 H10 O5	162.053	1.216
libenzapril	C18 H25 N3 O5	363.18	8.49
linatine	C10 H17 N3 O5	259.116	1.757
Linoleic acid	C18 H32 O2	280.24	9.394
Linolenelaidic acid	C18 H30 O2	278.224	9.598
Linoleyl carnitine	C25 H45 N O4	423.334	9.406
L-Lysine	C6 H14 N2 O2	146.105	0.998
Lotaustralin	C11 H19 N O6	261.121	1.895
L-Phenylalanine	C9 H11 N O2	148.052	4.245
L-Proline	C5 H9 N O2	115.063	0.989
L-Pyroglutamic acid	C5 H7 N O3	129.042	1.173
L-Threonic acid	C4 H8 O5	136.037	1.438
L-Tyrosine	C9 H11 N O3	181.074	2.19
LysoPC(18:3(9Z,12Z,15Z))	C26 H48 N O7 P	517.317	9.666
LysoPC(20:5(5Z,8Z,11Z,14Z,17Z))	C28 H48 N O7 P	541.317	9.621
LysoPC(22:5(7Z,10Z,13Z,16Z,19Z))	C30 H52 N O7 P	569.348	10.115
Malonic acid	C3 H4 O4	104.011	1.524
Methamphetamine	C10 H15 N	149.12	5.784
metharbital	C9 H14 N2 O3	198.1	4.53
Methionine	C5 H11 N O2 S	149.051	1.67
Metolachlor morpholinone	C14 H19 N O2	233.141	6.818
MHPG	C9 H12 O4	184.073	6.521
Morphine-3-glucuronide	C23 H27 N O9	461.168	2.654
Muscimol	C4 H6 N2 O2	114.043	1.645
myristic acid	C14 H28 O2	228.209	9.151
N(6)-Methyladenosine	C11 H15 N5 O4	281.112	1.728
N6-Acetyl-L-lysine	C8 H16 N2 O3	147.089	1.647
N6-METHYLLYSINE	C7 H16 N2 O2	160.121	1.124
N8-Acetylspermidine	C9 H21 N3 O	187.168	1.107
N-Acetylcytidine	C11 H15 N3 O6	285.096	4.591
N-acetyl-L-2-aminoadipic acid	C8 H13 N O5	203.079	4.316
N-Acetyl-L-glutamic acid	C7 H11 N O5	189.064	2.068
N-Acetyl-L-phenylalanine	C11 H13 N O3	207.089	6.782
N-Acetyl-L-tyrosine	C11 H13 N O4	223.084	5.52
N-Acetylneuraminic acid	C11 H19 N O9	309.106	6.001
N-Acetylvanilalanine	C12 H15 N O5	253.095	5.76
Naphthalen-2-amine	C10 H9 N	143.073	5.268
Nelarabine	C11 H15 N5 O5	297.107	4.307
N-feruloylglycine	C12 H13 N O5	251.08	4.217
N-Formylmethionine	C6 H11 N O3 S	177.046	4.628
Nicotinamide	C6 H6 N2 O	122.048	1.704
Nicotine	C10 H14 N2	162.116	1.738
Nicotinuric acid	C8 H8 N2 O3	180.053	5.575
N-Isobutyrylglycine	C6 H11 N O3	145.074	4.281
N-Isovalerylglycine	C7 H13 N O3	159.089	5.848
Nitrazepam	C15 H11 N3 O3	281.08	8.357
N-methylethanolamine phosphate	C3 H10 N O4 P	155.035	1.283
Nonanoic acid	C9 H18 O2	158.131	7.746
Nordiazepam	C15 H11 Cl N2 O	270.056	8.643
Normorphine	C16 H17 N O3	271.121	3.262
NPPB	C16 H16 N2 O4	300.11	7.34
N-Propionylmethionine	C8 H15 N O3 S	205.077	6.317
N-Tigloylglycine	C7 H11 N O3	157.074	5.472
Octachlorooxanthrene	C12 Cl8 O2	455.741	5.31
Octyl gallate	C15 H22 O5	282.147	8.765
Oglufanide	C16 H19 N3 O5	333.133	6.04
oleandolide	C20 H34 O7	386.231	9.435
Oleic acid	C18 H34 O2	282.256	9.632
OLEOYL TYROSINE	C27 H43 N O4	445.319	9.199
ophthalmic acid	C11 H19 N3 O6	289.127	1.835
Oxazepam	C15 H11 Cl N2 O2	286.051	8.358
oxiracetam	C6 H10 N2 O3	158.069	1.139
Oxybuprocaine	C17 H28 N2 O3	308.21	9.266
Palmitelaidic acid	C16 H30 O2	254.224	10.133
Palmitic acid	C16 H32 O2	256.24	9.542
Palmitoylcarnitine	C23 H45 N O4	399.334	9.548
Pantothenic acid	C9 H17 N O5	219.11	4.748
p-coumaroylagmatine	C14 H20 N4 O2	276.157	9.63
Penciclovir	C10 H15 N5 O3	253.117	1.776
pentoxyl	C6 H8 N2 O3	156.053	1.198
phenacetin	C10 H13 N O2	179.094	6.094
Phenylacetylglycine	C10 H11 N O3	193.074	6.414
Phenylglyoxylic acid	C8 H6 O3	150.032	5.472
Phenylhydrazine	C6 H8 N2	108.069	0.974
Phenylisocyanate	C7 H5 N O	119.037	8.325
Phosphatidylserine	C42 H82 N O10 P	791.568	10.286
Phosphoric acid	H3 O4 P	97.9768	1.289
Piroxicam	C15 H13 N3 O4 S	331.063	4.461
Porphobilinogen	C10 H14 N2 O4	226.095	4.695
Pregabalin	C8 H17 N O2	159.126	1.628
Prinomide	C15 H13 N3 O2	267.101	5.761
promolate	C16 H23 N O4	293.162	6.593
PROPAPHOS	C13 H21 O4 P S	304.091	2.335
Propionylcarnitine	C10 H19 N O4	217.131	2.578
Prunin	C21 H22 O10	434.121	6.07
Pseudouridine	C9 H12 N2 O6	244.069	1.653
Pyrogallol-2-O-glucuronide	C12 H14 O9	302.064	4.487
Pyruvic acid	C3 H4 O3	88.016	1.526
Reduced Glutathione	C10 H17 N3 O6 S	307.083	1.666
Resolvin E1	C20 H30 O5	368.22	8.984
Rhein	C15 H8 O6	284.035	8.902
S-(Formylmethyl)glutathione	C12 H19 N3 O7 S	349.094	6.284
Salbutamol	C13 H21 N O3	239.152	6.43
SECONAL	C12 H18 N2 O3	238.132	6.822
sinapoylglucose	C17 H22 O10	386.121	6.068
Skatole	C9 H9 N	131.073	5.254
Sorbitan, monododecanoate	C18 H34 O6	346.235	8.105
Spermidine	C7 H19 N3	128.131	0.981
Stachydrine	C7 H13 N O2	143.094	1.25
stearoylcarnitine	C25 H49 N O4	427.366	9.885
streptidine	C8 H18 N6 O4	262.139	1.513
Suberic acid	C8 H14 O4	174.089	5.842
Succinic acid	C4 H6 O4	118.027	2.165
Succinic semialdehyde	C4 H6 O3	102.032	1.313
Succinylacetone	C7 H10 O4	158.058	5.383
Succinyladenosine	C14 H17 N5 O8	383.108	4.835
Sulfamic acid	H3 N O3 S	96.9833	0.959
Taurine	C2 H7 N O3 S	125.015	1.16
Temazepam	C16 H13 Cl N2 O2	300.066	8.849
Tetraacetylethylenediamine	C10 H16 N2 O4	228.111	5.344
Tetradecanedioic acid	C14 H26 O4	258.183	9.233
Tetraxetan	C16 H28 N4 O8	404.19	4.99
threonylphenylalanine	C13 H18 N2 O4	266.126	2.637
Thromboxane B2	C20 H34 O6	370.236	8.179
Tiglylcarnitine	C12 H21 N O4	243.147	6.706
Timonacic	C4 H7 N O2 S	133.019	1.214
tranexamic acid	C8 H15 N O2	157.11	1.661
trans-2-Dodecenoylcarnitine	C19 H35 N O4	341.256	8.473
Traumatic Acid	C12 H20 O4	228.136	8.223
Traumatin	C12 H20 O3	212.141	9.689
Triethyl citrate	C12 H20 O7	276.121	4.978
Trifluoroacetic acid	C2 H F3 O2	113.993	1.053
Trihydroxycoprostanic acid	C27 H46 O5	450.335	9.149
Tyramine	C8 H11 N O	137.084	4.37
tyr-glu	C14 H18 N2 O6	310.116	4.621
Undecanoic acid	C11 H22 O2	186.162	9.629
Uracil	C4 H4 N2 O2	112.027	2.107
Uridine	C9 H12 N2 O6	244.07	2.122
Valerophenone	C11 H14 O	162.104	8.786
Valine	C5 H11 N O2	117.079	1.619
valtrate	C22 H30 O8	422.194	7.761
Vigabatrin	C6 H11 N O2	129.079	1.646
Viloxazine	C13 H19 N O3	237.136	6.476
Vitamin C	C6 H8 O6	176.032	2.255
Xanthine	C5 H4 N4 O2	152.033	1.986
Xanthosine	C10 H12 N4 O6	284.076	4.196
Xanthurenic acid	C10 H7 N O4	205.037	5.402
Xylitol	C5 H12 O5	152.068	1.19
Zaleplon	C17 H15 N5 O	305.127	8.226
α-Eleostearic acid	C18 H30 O2	278.225	11.397
β-D-Glucopyranuronic acid	C6 H10 O7	194.043	1.178
β-Muricholic acid	C24 H40 O5	454.293	8.629

## Sheet: 244 metabolites in Brainstem
Name	Formula	Molecular Weight	RT [min]
(-)-Prostaglandin E2	C20 H32 O5	352.224	7.591
(+/-)13-HODE	C18 H32 O3	296.234	10.208
(+/-)-2-Hydroxyglutaric acid	C5 H8 O5	148.037	2.119
(+/-)-pantetheine	C11 H22 N2 O4 S	278.129	5.598
(R)-3-hydroxybutyrylcarnitine	C11 H21 N O5	247.142	1.779
1-[(9Z)-hexadecenoyl]-sn-glycero-3-phosphocholine	C24 H48 N O7 P	493.317	9.704
10-GINGEROL	C21 H34 O4	350.245	11.636
12-Hydroxylauric acid	C12 H24 O3	216.172	9.131
15,16-DiHODE	C18 H32 O4	312.23	10.076
1-Heptanethiol	C7 H16 S	132.098	2.266
1-Methylhistamine	C6 H11 N3	125.095	0.862
1-Stearoyl-2-oleoyl-sn-glycerol	C39 H74 O5	622.553	12.441
2,4-dihydroxyheptadec-16-ynyl acetate	C19 H34 O4	326.245	11.723
2-Amino-3-hydroxyoctadecyl dihydrogen phosphate	C18 H40 N O5 P	381.264	9.542
2-Furoic acid	C5 H4 O3	112.016	1.677
2-Hydroxycaproic acid	C6 H12 O3	132.078	6.234
2-Hydroxyvaleric acid	C5 H10 O3	118.063	4.954
2-Methyl-3-thioacetoxy-4,5-dihydrofuran	C7 H10 O2 S	158.04	4.712
2-methylcitric acid	C7 H10 O7	206.042	1.199
3,4-Dihydroxyphenylacetic acid	C8 H8 O4	168.042	5.194
3,5,7-Octatriyn-1-ol	C8 H6 O	118.042	1.135
3'-Dephosphocoenzyme A	C21 H35 N7 O13 P2 S	687.148	4.65
3-Hydroxy-3-methylglutaric acid	C6 H10 O5	162.052	2.525
3-Hydroxybenzyl alcohol	C7 H8 O2	124.052	5.197
3-Hydroxydecanoic acid	C10 H20 O3	188.141	8.712
3-Hydroxynonanoic acid	C9 H18 O3	174.125	8.189
3-Hydroxysebacic acid	C10 H18 O5	218.115	6.659
3-Methylglutarylcarnitine	C13 H23 N O6	289.152	4.606
3-Oxotetradecanoic acid	C14 H26 O3	242.188	10.028
3-Phenylpropanoic acid	C9 H10 O2	150.068	3.786
3-Thiomorpholinecarboxylic acid	C5 H9 N O2 S	147.035	1.127
4-Undecylbenzenesulfonic acid	C17 H28 O3 S	312.176	18.221
5-guanidino-2-oxopentanoic acid	C6 H11 N3 O3	173.08	1.502
5-Hydroxy-2-furoic acid	C5 H4 O4	128.011	1.51
6-Hydroxybuspirone	C21 H31 N5 O3	401.241	8.531
6-hydroxypseudooxynicotine	C10 H14 N2 O2	194.105	4.056
7-Aminonitrazepam	C15 H13 N3 O	251.106	5.163
A-12(13)-EpODE	C18 H30 O3	294.219	9.899
Aceglutamide	C7 H12 N2 O4	188.08	1.551
Acetanilide	C8 H9 N O	135.068	5.958
Acetylcarnitine	C9 H17 N O4	203.115	6.528
Acetyl-L-carnitine	C9 H17 N O4	203.116	1.084
Acetyl-β-methylcholine	C8 H17 N O2	159.126	1.082
ACPC	C4 H7 N O2	101.048	1.04
Adenine	C5 H5 N5	135.054	1.555
Adenosine 5-monophosphate	C10 H14 N5 O7 P	306.036	1.116
Adenosine diphosphate (ADP)	C10 H15 N5 O10 P2	427.029	1.514
Adenosine diphosphate ribose	C15 H23 N5 O14 P2	559.071	1.522
Adenylsuccinic acid	C14 H18 N5 O11 P	463.074	4.035
adrenaline	C9 H13 N O3	183.09	4.646
Adrenic acid	C22 H36 O2	332.271	12.214
Ala-Tyr	C12 H16 N2 O4	252.111	4.975
alpha.-Aminoadipic acid	C6 H11 N O4	161.069	1.533
Aminohippuric acid	C9 H10 N2 O3	194.069	5.004
Amphetamine	C9 H13 N	118.078	5.491
Arachidonic acid	C20 H32 O2	304.24	11.586
Arg-pro	C11 H21 N5 O3	271.164	4.277
asn-val	C9 H17 N3 O4	231.122	1.033
asp-leu	C10 H18 N2 O5	246.121	4.67
Benzaldehyde	C7 H6 O	106.042	4.148
Betaine	C5 H11 N O2	117.079	1.056
Caprolactam	C6 H11 N O	113.084	1.075
carnosine	C9 H14 N4 O3	226.106	0.896
Cholecalciferol	C27 H44 O	384.339	12.295
Choline	C5 H13 N O	103.1	1.132
Cinnamyl alcohol	C9 H10 O	134.073	8.568
Citric acid	C6 H8 O7	192.027	1.111
Codeine	C18 H21 N O3	299.152	5.344
Corticosterone	C21 H30 O4	346.214	8.381
Creatine	C4 H9 N3 O2	131.069	1.05
Creatinine	C4 H7 N3 O	113.059	18.282
Cys-pro	C8 H14 N2 O3 S	218.072	4.454
Cysteine-glutathione disulfide	C13 H22 N4 O8 S2	426.088	1.063
cytidine 5′-monophosphate	C9 H14 N3 O8 P	323.052	1.487
Cytosine	C4 H5 N3 O	111.043	1.547
D-(-)-3-Phosphoglyceric acid	C3 H7 O7 P	185.993	1.217
D-(+)-Proline	C5 H9 N O2	115.063	1.07
Demoxepam	C15 H11 Cl N2 O2	286.051	7.919
Deoxycholic Acid	C24 H40 O4	392.292	9.9
D-Gluconic acid	C6 H12 O7	196.058	1.048
D-Glucopyranose	C6 H12 O6	180.063	1.482
D-Glucosamine 6-phosphate	C6 H14 N O8 P	259.045	1.028
Diazepam	C16 H13 Cl N2 O	284.071	9.134
Dibutyl phthalate	C16 H22 O4	278.151	10.502
Dihydrothymine	C5 H8 N2 O2	128.059	1.046
dihydroxyphenylalanine	C9 H11 N O4	197.068	5.412
Diphenol glucuronide	C12 H14 O8	286.068	9.137
DL-4-Hydroxyphenyllactic acid	C9 H10 O4	182.058	5.288
DL-Alanylglycine	C5 H10 N2 O3	146.069	1.126
DL-Arginine	C6 H14 N4 O2	174.112	0.992
DL-Carnitine	C7 H15 N O3	161.105	1.176
DL-Cycloserine	C3 H6 N2 O2	102.043	0.844
DL-Glutamine	C5 H10 N2 O3	146.069	0.997
DL-Lysine	C6 H14 N2 O2	146.105	0.88
DL-Tryptophan	C11 H12 N2 O2	204.09	5.174
D-lysopine	C9 H18 N2 O4	218.126	4.319
Docosahexaenoic acid	C22 H32 O2	328.24	11.416
Dodecanedioic acid	C12 H22 O4	230.151	8.442
D-PANTOTHENIC ACID	C9 H17 N O5	219.11	4.646
Erythrose, 4-phosphate	C4 H9 O7 P	200.008	1.11
Estazolam	C16 H11 Cl N4	294.067	8.269
Ferulic acid 4-sulfate	C10 H10 O7 S	274.015	5.944
Flavin adenine dinucleotide (FAD)	C27 H33 N9 O15 P2	785.157	5.498
Fumaric acid	C4 H4 O4	116.01	1.078
Gabapentin	C9 H17 N O2	171.126	6.598
gamma-Glu-gln	C10 H17 N3 O6	275.111	1.077
g-Butyrobetaine	C7 H15 N O2	145.11	9.539
g-Guanidinobutyrate	C5 H11 N3 O2	145.085	1.371
Ginkgoic acid	C22 H34 O3	346.25	10.875
Glu-Met	C10 H18 N2 O5 S	278.093	7.653
Glycerol 3-phosphate	C3 H9 O6 P	172.013	1.029
Glycerophosphoglycerol	C6 H15 O8 P	246.05	1.034
Glycyl-L-leucine	C8 H16 N2 O3	188.116	4.558
Gly-Leu	C8 H16 N2 O3	188.116	3.16
Gly-Phe	C11 H14 N2 O3	222.1	5.095
Guanosine monophosphate (GMP)	C10 H14 N5 O8 P	363.057	1.555
Harmine	C13 H12 N2 O	212.095	5.885
Hexitol	C6 H14 O6	182.078	1.021
Hippuric acid	C9 H9 N O3	179.058	5.96
Homocarnosine	C10 H16 N4 O3	240.122	0.997
Homovanillic acid sulfate	C9 H10 O7 S	262.014	5.154
Hydroxyhexanoycarnitine	C13 H25 N O5	275.173	4.447
Hydroxyzine	C21 H27 Cl N2 O2	374.177	4.376
Hypoxanthine	C5 H4 N4 O	136.038	1.696
Hypusine	C10 H23 N3 O3	233.174	0.845
icomucret	C20 H32 O3	320.234	10.829
Indane	C9 H10	118.078	5.708
Indole	C8 H7 N	117.058	8.069
Indole-3-acrylic acid	C11 H9 N O2	187.063	5.176
Indole-3-lactic acid	C11 H11 N O3	205.077	6.625
IpA	C11 H11 N O2	189.079	4.173
Isovalerylglutamic acid	C10 H17 N O5	231.11	5.778
Itaconic acid	C5 H6 O4	130.026	2.015
Kojic acid	C6 H6 O4	142.027	1.122
Kynurenine	C10 H12 N2 O3	208.085	3.865
L-(-)-Asparagine	C4 H8 N2 O3	132.053	1.565
L-(-)-Methionine	C5 H11 N O2 S	149.051	1.573
L-(+)-Aspartic acid	C4 H7 N O4	133.037	1.785
L-(+)-Lactic acid	C3 H6 O3	90.0314	1.244
L-alpha-Aspartyl-L-phenylalanine	C13 H16 N2 O5	280.105	4.136
L-Aspartic acid	C4 H7 N O4	133.037	1.565
L-Carnosine	C9 H14 N4 O3	226.106	0.992
leu-gln	C11 H21 N3 O4	259.153	4.484
Leu-Glu	C11 H20 N2 O5	260.137	5.319
Leu-Leu	C12 H24 N2 O3	244.179	5.83
Leu-Val	C11 H22 N2 O3	230.163	4.819
L-gamma-Glutamyl-L-leucine	C11 H20 N2 O5	260.137	4.704
L-Glutamic acid	C5 H9 N O4	147.053	1.014
L-Histidine	C6 H9 N3 O2	155.069	0.994
Linoleic acid	C18 H32 O2	280.24	11.745
L-Norleucine	C6 H13 N O2	131.095	2.248
Lotaustralin	C11 H19 N O6	261.121	1.823
L-Phenylalanine	C9 H11 N O2	148.052	4.152
L-Pyroglutamic acid	C5 H7 N O3	129.043	1.087
L-Tyrosine	C9 H11 N O3	164.047	2.122
Maslinic acid	C30 H48 O4	472.355	10.928
Menadione	C11 H8 O2	172.052	7.823
Methamphetamine	C10 H15 N	149.12	5.708
Methionine	C5 H11 N O2 S	149.051	1.131
Methohexital	C14 H18 N2 O3	262.132	5.469
methyprylon	C10 H17 N O2	183.126	6.778
Monobutyl phthalate	C12 H14 O4	222.089	8.648
Myristoleic acid	C14 H26 O2	226.193	10.792
N~1~-Isopropyl-2-methylpropan-1,2-diamin	C7 H18 N2	130.147	0.862
N6-METHYLLYSINE	C7 H16 N2 O2	160.121	0.865
N8-Acetylspermidine	C9 H21 N3 O	187.168	0.889
N-Acetyl-1-aspartylglutamic acid	C11 H16 N2 O8	304.09	2.241
N-Acetylalanine	C5 H9 N O3	131.058	1.573
N-Acetylaspartic acid	C6 H9 N O5	175.048	1.573
N-Acetyl-DL-glutamic acid	C7 H11 N O5	189.063	1.968
N-Acetylglucosamine 1-phosphate	C8 H16 N O9 P	301.056	1.034
N-acetyl-L-2-aminoadipic acid	C8 H13 N O5	203.079	1.451
N-Acetyl-L-glutamic acid	C7 H11 N O5	189.063	1.244
N-Acetyl-L-histidine	C8 H11 N3 O3	197.08	0.934
N-Acetylneuraminic acid	C11 H19 N O9	309.105	1.038
N-Acetylvanilalanine	C12 H15 N O5	253.095	5.658
NADH	C21 H29 N7 O14 P2	665.124	3.947
Naphthalen-2-amine	C10 H9 N	143.073	5.173
N-Arachidonylglycine	C22 H35 N O3	361.261	10.886
n-Butyl lactate	C7 H14 O3	146.094	7.277
Nelarabine	C11 H15 N5 O5	297.107	4.232
N-Formyl-L-glutamic acid	C6 H9 N O5	175.048	1.818
N-Formylmethionine	C6 H11 N O3 S	177.046	5.068
N-Gluconyl ethanolamine phosphate	C8 H18 N O10 P	319.066	1.03
Nicotinamide	C6 H6 N2 O	122.048	1.608
Nitrazepam	C15 H11 N3 O3	281.08	8.268
Nitrendipine	C18 H20 N2 O6	360.132	6.936
Nordiazepam	C15 H11 Cl N2 O	270.056	8.547
Oleic Acid	C18 H34 O2	282.255	12.403
ophthalmic acid	C11 H19 N3 O6	289.127	1.75
Oxazepam	C15 H11 Cl N2 O2	286.051	8.272
Oxycodone	C18 H21 N O4	315.147	4.253
Palmitic acid	C16 H32 O2	256.24	9.512
Palmitoleic acid	C16 H30 O2	254.224	9.245
Palmitoylcarnitine	C23 H45 N O4	399.335	9.513
phe-gln	C14 H19 N3 O4	293.137	4.049
Phenobarbital	C12 H12 N2 O3	232.084	6.57
Phenylpyruvic acid	C9 H8 O3	164.047	1.137
phosphoethanolamine	C2 H8 N O4 P	141.019	1.009
Pipecolic acid	C6 H11 N O2	129.079	0.876
Pregabalin	C8 H17 N O2	159.126	1.544
Promazine	C17 H20 N2 S	284.134	7.667
promazine sulfoxide	C17 H20 N2 O S	300.129	6.441
propionylcarnitine	C10 H19 N O4	217.131	6.924
Prostaglandin D2	C20 H32 O5	352.224	8.491
Pyridoxal 5'-phosphate	C8 H10 N O6 P	247.024	1.703
Pyrophosphoric Acid	H4 O7 P2	177.943	1.249
S-Allyl-L-cysteine	C6 H11 N O2 S	161.051	2.923
spermidine	C7 H19 N3	145.158	0.805
Spermine	C10 H26 N4	202.216	0.838
Sphingosine 1-phosphate	C18 H38 N O5 P	379.248	9.386
Stachydrine	C7 H13 N O2	143.095	0.867
Stearic acid	C18 H36 O2	284.271	13.448
Stearoyl ethanolamide	C20 H41 N O2	327.313	12.218
stearoylcarnitine	C25 H49 N O4	428.366	9.604
steviol	C20 H30 O3	318.219	10.078
Suberic acid	C8 H14 O4	174.089	5.255
Succinic acid	C4 H6 O4	118.026	1.03
Succinyladenosine	C14 H17 N5 O8	383.107	4.737
Sulfamic acid	H3 N O3 S	96.9834	0.848
Taurine	C2 H7 N O3 S	125.014	1.005
Temazepam	C16 H13 Cl N2 O2	300.066	8.759
Thymidine	C10 H14 N2 O5	242.09	4.387
Tiglylcarnitine	C12 H21 N O4	243.147	5.49
trans-Aconitic acid	C6 H6 O6	174.016	2.006
trans-Petroselinic acid	C18 H34 O2	282.256	12.4
Triazolam	C17 H12 Cl2 N4	342.046	1.161
Triethanolamine	C6 H15 N O3	149.105	1.002
Trifluoroacetic acid	C2 H F3 O2	113.993	0.928
trimethadione	C6 H9 N O3	143.058	1.079
trp-glu	C16 H19 N3 O5	333.132	5.958
TxB2	C20 H34 O6	370.235	8.036
UDP-N-acetylglucosamine	C17 H27 N3 O17 P2	607.081	1.062
Uracil	C4 H4 N2 O2	112.027	1.117
Uric Acid	C5 H4 N4 O3	168.028	1.616
Uridine	C9 H12 N2 O6	244.069	2.074
Uridine monophosphate	C9 H13 N2 O9 P	324.036	1.549
Valine	C5 H11 N O2	117.079	1.503
Vitamin C	C6 H8 O6	176.032	1.509
Xanthine	C5 H4 N4 O2	152.033	1.927
Zaleplon	C17 H15 N5 O	305.127	8.139
β-Cortolone	C21 H34 O5	348.23	7.78
β-Muricholic acid	C24 H40 O5	454.292	8.564
Υ-Aminobutyric acid (GABA)	C4 H9 N O2	103.063	1.011
